# Supplementary material
Source: PubMed Central journal article supplement (PMC4965399)
Supplement: 13311_2016_427_MOESM2_ESM.pdf [file 13311_2016_427_MOESM2_ESM.pdf]

**Table S1** Rotarod analysis of *Npc1*<sup>+/+</sup> (n<sub>female</sub> = 11; n<sub>male</sub> = 7), *Npc1*<sup>+/-</sup> (n<sub>female</sub> = 15; n<sub>male</sub> = 15) and *Npc1*<sup>-/-</sup> (n<sub>female</sub> = 9; n<sub>male</sub> = 5) mice, measured at 5, 7, and 9 weeks of age.

|                                    | <i>Npc1</i> <sup>+/+</sup>                               |     |           |          | <i>Npc1</i> <sup>+/-</sup>                               |     |            |          | <i>Npc1</i> <sup>-/-</sup>                               |     |            |          |
|------------------------------------|----------------------------------------------------------|-----|-----------|----------|----------------------------------------------------------|-----|------------|----------|----------------------------------------------------------|-----|------------|----------|
|                                    | Change in distance travelled (mm, cube root transformed) | SE  | 95% CI    | <i>p</i> | Change in distance travelled (mm, cube root transformed) | SE  | 95% CI     | <i>p</i> | Change in distance travelled (mm, cube root transformed) | SE  | 95% CI     | <i>p</i> |
| <b>Week 7 (compared to Week 5)</b> | 1.1                                                      | 0.3 | 0.7, 1.6  | <0.0001  | 0.3                                                      | 0.2 | -0.1, 0.7  | 0.1      | -1.7                                                     | 0.3 | -2.3, -1.1 | <0.0001  |
| <b>Week 9 (compared to Week 5)</b> | 0.6                                                      | 0.2 | 0.1, 1.1  | 0.01     | 0.2                                                      | 0.2 | -0.2, 0.5  | 0.3      | -3.4                                                     | 0.3 | -4.0, -2.8 | <0.0001  |
| <b>Male (compared to female)</b>   | -0.7                                                     | 0.5 | -1.6, 0.2 | 0.1      | -1.6                                                     | 0.5 | -2.6, -0.7 | <0.0001  | -1.4                                                     | 0.4 | -2.2, -0.6 | 0.001    |

Data was cube root transformed to ensure satisfaction of distributional assumptions. Random effects generalized least squares regression with animals as a random effect, adjusted for age, gender, and training/testing day or age and training/testing day.
