# Supplementary material
Source: PubMed Central journal article supplement (PMC4965399)
Supplement: 13311_2016_427_MOESM3_ESM.pdf [file 13311_2016_427_MOESM3_ESM.pdf]

**Table S2** DigiGait indices of *Npc1*<sup>+/+</sup> (n<sub>female</sub> = 11; n<sub>male</sub> = 7), and *Npc1*<sup>+/-</sup> (n<sub>female</sub> = 15; n<sub>male</sub> = 15) mice, measured at 5, 7, and 9 weeks of age.

|                                              | Change in <i>Npc1</i> <sup>+/-</sup><br>(compared to <i>Npc1</i> <sup>+/+</sup> ) | SE    | 95% CI         | <i>p</i> |
|----------------------------------------------|-----------------------------------------------------------------------------------|-------|----------------|----------|
| Step sequence<br>alternation, % <sup>a</sup> | 4                                                                                 | 2.7   | -1.4, 9.4      | 0.1      |
| Forelimb<br>stance width, cm <sup>b</sup>    | 0.003                                                                             | 0.05  | -0.1, 0.1      | 1.0      |
| Hindlimb<br>stance width, cm <sup>b</sup>    | -0.1                                                                              | 0.07  | -0.2, 0.02     | 0.1      |
| Swing duration,<br>ms <sup>b</sup>           | 0.003                                                                             | 0.002 | -0.001, 0.01   | 0.1      |
| Braking duration,<br>ms <sup>b</sup>         | 0.004                                                                             | 0.002 | -0.0004, 0.001 | 0.08     |
| Stance duration,<br>ms <sup>b</sup>          | 0.005                                                                             | 0.003 | -0.001, 0.01   | 0.1      |
| Gait symmetry <sup>b</sup>                   | 0.004                                                                             | 0.01  | -0.01, 0.02    | 0.6      |

<sup>a</sup>Median regression, adjusted for age and gender.

<sup>b</sup>Random effects generalized least squares regression with animals as a random effect, adjusted for age and gender.
