# Supplementary material
Source: PubMed Central journal article supplement (PMC4965399)
Supplement: 13311_2016_427_MOESM4_ESM.pdf [file 13311_2016_427_MOESM4_ESM.pdf]

# Figure S1

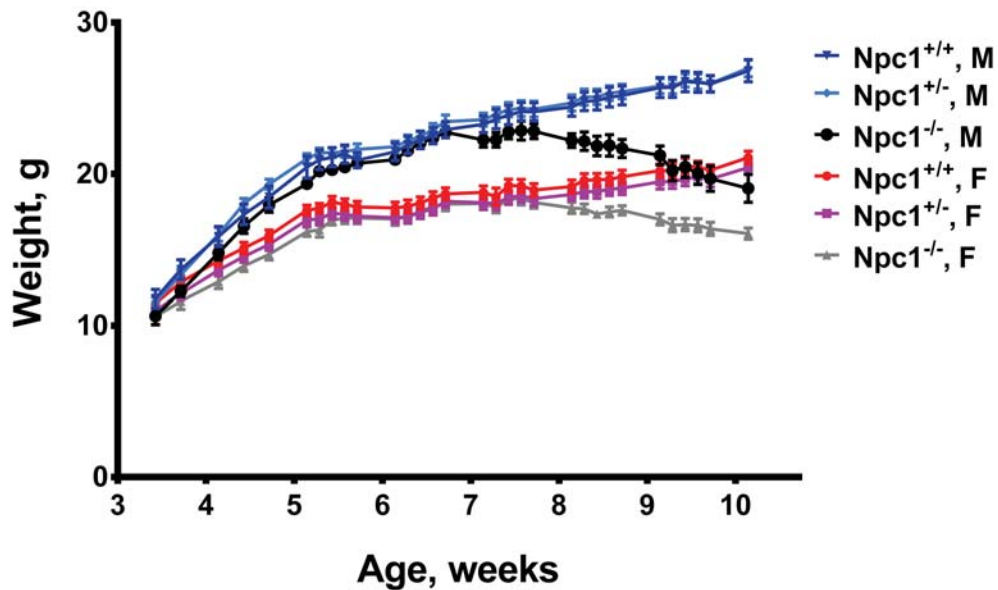

**Figure S1** Body weight of *Npc1*<sup>+/+</sup> ( $n_{\text{female}} = 11$ ;  $n_{\text{male}} = 7$ ), *Npc1*<sup>+/-</sup> ( $n_{\text{female}} = 15$ ;  $n_{\text{male}} = 15$ ) and *Npc1*<sup>-/-</sup> ( $n_{\text{female}} = 9$ ;  $n_{\text{male}} = 5$ ) mice from 3 – 10 weeks of age. As expected, there was a gender difference in weight, where the weight of male mice was greater than that of female mice. There was no significant difference in weight between *Npc1*<sup>+/+</sup> and *Npc1*<sup>+/-</sup> mice, but there was a marked weight loss in *Npc1*<sup>-/-</sup> mice from 7 weeks of age onwards. Data represent mean  $\pm$  SEM.
