# Supplementary material
Source: PubMed Central journal article supplement (PMC4965399)
Supplement: 13311_2016_427_MOESM5_ESM.pdf [file 13311_2016_427_MOESM5_ESM.pdf]

Figure S2

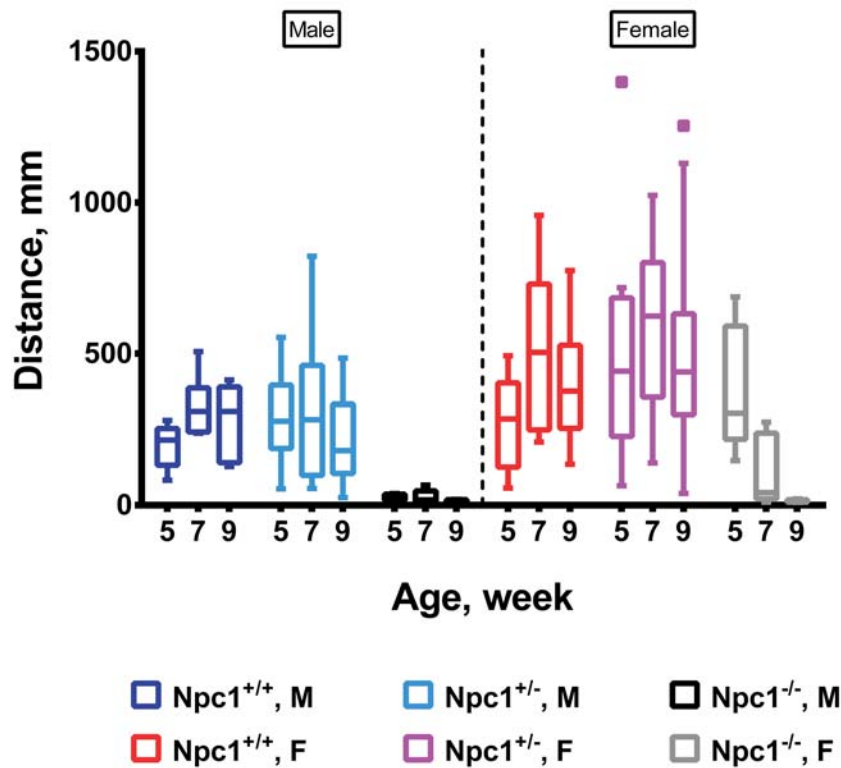

|                            | Change in distance travelled<br>(mm, cube root transformed)<br>(compared to <i>Npc1</i> <sup>+/+</sup> ) | SE  | 95% CI     | p       |
|----------------------------|----------------------------------------------------------------------------------------------------------|-----|------------|---------|
| <i>Npc1</i> <sup>+/-</sup> | 0.1                                                                                                      | 0.3 | -0.5, 0.8  | 0.7     |
| <i>Npc1</i> <sup>-/-</sup> | -2.9                                                                                                     | 0.4 | -3.6, -2.1 | <0.0001 |

**Figure S2** Distance travelled on an accelerating Rotarod by *Npc1*<sup>+/+</sup> ( $n_{\text{female}} = 11$ ;  $n_{\text{male}} = 7$ ), *Npc1*<sup>+/-</sup> ( $n_{\text{female}} = 15$ ;  $n_{\text{male}} = 15$ ) and *Npc1*<sup>-/-</sup> ( $n_{\text{female}} = 9$ ;  $n_{\text{male}} = 5$ ) mice, measured at 5, 7, and 9 weeks of age. The box and whiskers plot depicts the median, the inter-quartile range (IQR), and the maximum and minimum values within 1.5 times the IQR. Statistical analysis: Cube root transformation was applied to ensure satisfaction of distributional assumptions prior to analysis by random effects generalized least squares regression with the animals as a random effect. All analyses were adjusted for age, gender, and training/test day. There was a significant interaction between the three genotypes and age ( $p < 0.0001$ ), with the differences between *Npc1*<sup>+/+</sup> and *Npc1*<sup>-/-</sup> changing significantly over time and no significant difference was detected between *Npc1*<sup>+/+</sup> and *Npc1*<sup>+/-</sup> mice.
