# Supplementary material
Source: PubMed Central journal article supplement (PMC4965399)
Supplement: 13311_2016_427_MOESM8_ESM.pdf [file 13311_2016_427_MOESM8_ESM.pdf]

# Figure S5

A.

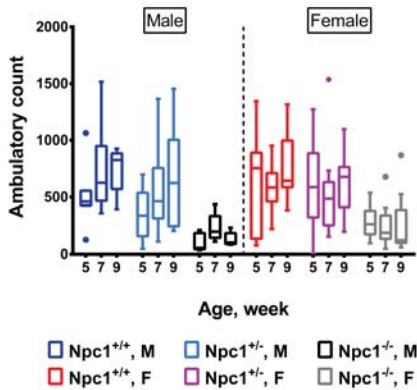

|                            | Square root change in ambulatory count (compared to <i>Npc1</i> <sup>+/+</sup> ) | SE  | 95% CI      | p       |
|----------------------------|----------------------------------------------------------------------------------|-----|-------------|---------|
| <i>Npc1</i> <sup>+/-</sup> | -2.2                                                                             | 1.6 | -5.3, 0.9   | 0.2     |
| <i>Npc1</i> <sup>-/-</sup> | -10.6                                                                            | 1.6 | -13.7, -7.5 | <0.0001 |

B.

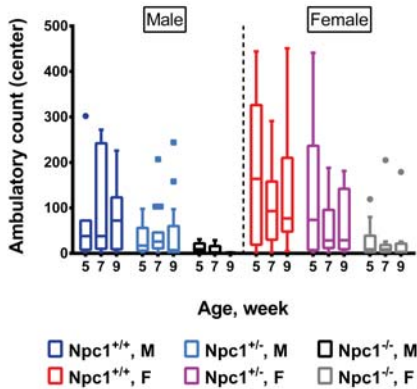

|                            | Change in center ambulatory count incidence rate ratio (compared to <i>Npc1</i> <sup>+/+</sup> ) | SE  | 95% CI   | p       |
|----------------------------|--------------------------------------------------------------------------------------------------|-----|----------|---------|
| <i>Npc1</i> <sup>+/-</sup> | 0.6                                                                                              | 0.1 | 0.4, 1.0 | 0.03    |
| <i>Npc1</i> <sup>-/-</sup> | 0.3                                                                                              | 0.1 | 0.2, 0.5 | <0.0001 |

|                                   | Change in center ambulatory count incidence rate ratio (compared to female) | SE  | 95% CI   | p     |
|-----------------------------------|-----------------------------------------------------------------------------|-----|----------|-------|
| Male                              | 0.6                                                                         | 0.1 | 0.4, 0.8 | 0.004 |
| <i>Npc1</i> <sup>+/+</sup> , male | 0.7                                                                         | 0.2 | 0.3, 1.3 | 0.2   |
| <i>Npc1</i> <sup>+/-</sup> , male | 0.6                                                                         | 0.2 | 0.3, 1.0 | 0.04  |
| <i>Npc1</i> <sup>-/-</sup> , male | 0.6                                                                         | 0.2 | 0.3, 1.4 | 0.2   |

**Figure S5** *Npc1*<sup>+/-</sup> mice ( $n_{\text{female}} = 15$ ;  $n_{\text{male}} = 15$ ) may have increased anxiety compared with *Npc1*<sup>+/+</sup> ( $n_{\text{female}} = 11$ ;  $n_{\text{male}} = 7$ ) mice. **(A)** The ambulatory count in the entire open-field arena showed no significant difference was detected between *Npc1*<sup>+/+</sup> and *Npc1*<sup>+/-</sup> mice. **(B)** However, the IRR of ambulatory count of *Npc1*<sup>+/-</sup> mice entering the center of the open-field arena was  $\approx 60\%$  that of *Npc1*<sup>+/+</sup> mice, indicating increased anxiety. The markedly reduced total arena and center ambulatory count of *Npc1*<sup>-/-</sup> mice compared to *Npc1*<sup>+/+</sup> mice was due to severe motor disability. The box and whiskers plot depicts the median, IQR, and the maximum and minimum values within 1.5 times the IQR. Statistical analysis: **(A)** Data was square root transformed to ensure satisfaction of distributional assumptions. Random effects generalized least squares regression with animals as a random effect, adjusted for age and gender. **(B)** Random effects negative binomial regression with animals as a random effect, adjusted for age and gender, or genotype and age, or age only.
