# Supplementary material
Source: PubMed Central journal article supplement (PMC4965399)
Supplement: 13311_2016_427_MOESM9_ESM.pdf [file 13311_2016_427_MOESM9_ESM.pdf]

# Figure S6

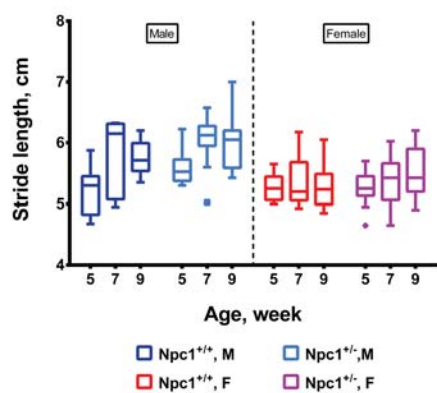

|                                   | Change in stride length, cm (compared to female) | SE  | 95% CI      | p       |
|-----------------------------------|--------------------------------------------------|-----|-------------|---------|
| Male                              | 0.4                                              | 0.1 | 0.3, 0.6    | <0.0001 |
| <i>Npc1</i> <sup>+/+</sup> , male | 0.3                                              | 0.1 | -0.001, 0.5 | 0.05    |
| <i>Npc1</i> <sup>+/-</sup> , male | 0.5                                              | 0.1 | 0.3, 0.7    | <0.0001 |

  

|        | Change in <i>Npc1</i> <sup>+/+</sup> stride length, cm (compared to Week 5) | SE  | 95% CI     | p    |
|--------|-----------------------------------------------------------------------------|-----|------------|------|
| Week 7 | 0.3                                                                         | 0.1 | 0.03, 0.5  | 0.03 |
| Week 9 | 0.2                                                                         | 0.1 | -0.03, 0.5 | 0.08 |

  

|        | Change in <i>Npc1</i> <sup>+/-</sup> stride length, cm (compared to Week 5) | SE  | 95% CI   | p       |
|--------|-----------------------------------------------------------------------------|-----|----------|---------|
| Week 7 | 0.3                                                                         | 0.1 | 0.1, 0.5 | 0.001   |
| Week 9 | 0.3                                                                         | 0.1 | 0.2, 0.5 | <0.0001 |

**Figure S6** Stride length of *Npc1*<sup>+/+</sup> ( $n_{\text{female}} = 10$ ;  $n_{\text{male}} = 5 - 6$ ) and *Npc1*<sup>+/-</sup> ( $n_{\text{female}} = 14$ ;  $n_{\text{male}} = 14 - 15$ ) mice, measured using DigiGait at 5, 7, and 9 weeks of age. The box and whiskers plot depicts the median, IQR, and the maximum and minimum values within 1.5 times the IQR. Statistical analysis: Random effects generalized least squares regression with animals as a random effect, adjusted for genotype and age, or genotype and gender.
