# Supplementary material
Source: PubMed Central journal article supplement (PMC4965399)
Supplement: 13311_2016_427_MOESM10_ESM.pdf [file 13311_2016_427_MOESM10_ESM.pdf]

# Figure S7

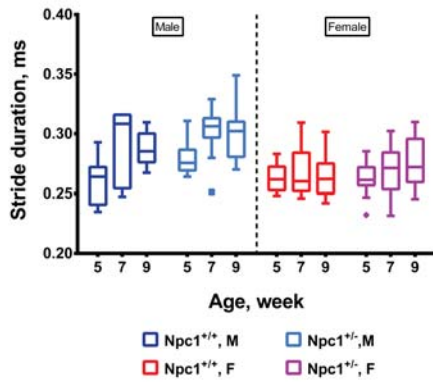

|                                   | Change in stride duration, ms (compared to female) | SE    | 95% CI                       | p       |
|-----------------------------------|----------------------------------------------------|-------|------------------------------|---------|
| <b>Male</b>                       | 0.02                                               | 0.004 | 0.01, 0.03                   | <0.0001 |
| <i>Npc1</i> <sup>+/+</sup> , male | 0.01                                               | 0.01  | -2.4x10 <sup>-6</sup> , 0.03 | 0.05    |
| <i>Npc1</i> <sup>+/-</sup> , male | 0.02                                               | 0.005 | 0.02, 0.03                   | <0.0001 |

  

|               | Change in <i>Npc1</i> <sup>+/+</sup> stride duration, ms (compared to Week 5) | SE   | 95% CI       | p    |
|---------------|-------------------------------------------------------------------------------|------|--------------|------|
| <b>Week 7</b> | 0.01                                                                          | 0.01 | 0.002, 0.03  | 0.02 |
| <b>Week 9</b> | 0.01                                                                          | 0.01 | -0.001, 0.02 | 0.07 |

  

|               | Change in <i>Npc1</i> <sup>+/-</sup> stride duration, ms (compared to Week 5) | SE    | 95% CI     | p       |
|---------------|-------------------------------------------------------------------------------|-------|------------|---------|
| <b>Week 7</b> | 0.02                                                                          | 0.004 | 0.01, 0.02 | <0.0001 |
| <b>Week 9</b> | 0.02                                                                          | 0.004 | 0.01, 0.03 | <0.0001 |

**Figure S7** Stride duration of *Npc1*<sup>+/+</sup> ( $n_{\text{female}} = 10$ ;  $n_{\text{male}} = 5 - 6$ ) and *Npc1*<sup>+/-</sup> ( $n_{\text{female}} = 14$ ;  $n_{\text{male}} = 14 - 15$ ) mice, measured using DigiGait at 5, 7, and 9 weeks of age. The box and whiskers plot depicts the median, IQR, and the maximum and minimum values within 1.5 times the IQR. Statistical analysis: Random effects generalized least squares regression with animals as a random effect, adjusted for genotype and age, age only, or genotype and gender.
