# Supplementary material
Source: PubMed Central journal article supplement (PMC4965399)
Supplement: 13311_2016_427_MOESM11_ESM.pdf [file 13311_2016_427_MOESM11_ESM.pdf]

# Figure S8

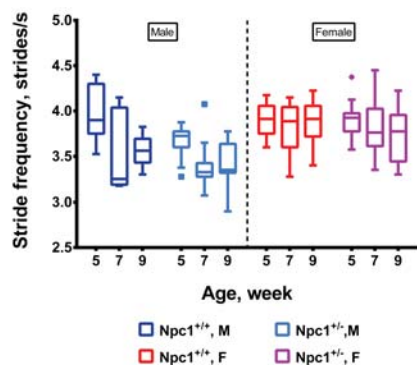

|                                   | Change in stride frequency, strides/s (compared to female) | SE   | 95% CI     | p       |
|-----------------------------------|------------------------------------------------------------|------|------------|---------|
| Male                              | -0.3                                                       | 0.05 | -0.4, -0.2 | <0.0001 |
| <i>Npc1</i> <sup>+/+</sup> , male | -0.2                                                       | 0.1  | -0.4, 0.02 | 0.07    |
| <i>Npc1</i> <sup>+/-</sup> , male | -0.3                                                       | 0.1  | -0.5, -0.2 | <0.0001 |

  

|        | Change in <i>Npc1</i> <sup>+/+</sup> stride frequency, strides/s (compared to Week 5) | SE  | 95% CI      | p    |
|--------|---------------------------------------------------------------------------------------|-----|-------------|------|
| Week 7 | -0.2                                                                                  | 0.1 | -0.4, -0.05 | 0.01 |
| Week 9 | -0.2                                                                                  | 0.1 | -0.3, 0.01  | 0.06 |

  

|        | Change in <i>Npc1</i> <sup>+/-</sup> stride frequency, strides/s (compared to Week 5) | SE   | 95% CI     | p       |
|--------|---------------------------------------------------------------------------------------|------|------------|---------|
| Week 7 | -0.2                                                                                  | 0.06 | -0.3, -0.1 | 0.001   |
| Week 9 | -0.2                                                                                  | 0.06 | -0.3, -0.1 | <0.0001 |

**Figure S8** Stride frequency of *Npc1*<sup>+/+</sup> ( $n_{\text{female}} = 10$ ;  $n_{\text{male}} = 5 - 6$ ) and *Npc1*<sup>+/-</sup> ( $n_{\text{female}} = 14$ ;  $n_{\text{male}} = 14 - 15$ ) mice, measured using DigiGait at 5, 7, and 9 weeks of age. The box and whiskers plot depicts the median, IQR, and the maximum and minimum values within 1.5 times the IQR. Statistical analysis: Random effects generalized least squares regression with animals as a random effect, adjusted for genotype and age, age only, or genotype and gender.
