# Supplementary material
Source: PubMed Central journal article supplement (PMC4965399)
Supplement: 13311_2016_427_MOESM12_ESM.pdf [file 13311_2016_427_MOESM12_ESM.pdf]

# Figure S9

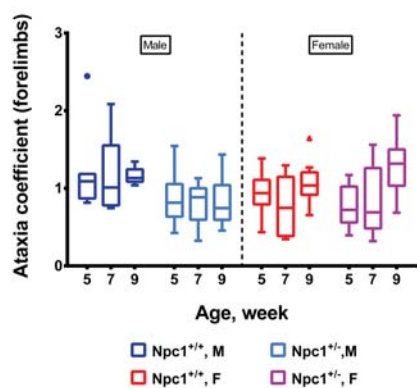

|           | Change in <i>Npc1</i> <sup>+/-</sup> ataxia coefficient (compared to <i>Npc1</i> <sup>+/+</sup> ) | SE  | 95% CI       | p    |
|-----------|---------------------------------------------------------------------------------------------------|-----|--------------|------|
| Average   | -0.1                                                                                              | 0.1 | -0.2, 0.02   | 0.1  |
| Forelimbs | -0.1                                                                                              | 0.1 | -0.3, -0.004 | 0.04 |
| Hindlimbs | -0.04                                                                                             | 0.1 | -0.2, 0.07   | 0.5  |

|        | Change in <i>Npc1</i> <sup>+/-</sup> forelimb ataxia coefficient (compared to Week 5) | SE  | 95% CI    | p   |
|--------|---------------------------------------------------------------------------------------|-----|-----------|-----|
| Week 7 | -0.2                                                                                  | 0.1 | -0.4, 0.1 | 0.2 |
| Week 9 | 0.05                                                                                  | 0.1 | -0.2, 0.3 | 0.7 |

|        | Change in <i>Npc1</i> <sup>+/-</sup> forelimb ataxia coefficient (compared to Week 5) | SE  | 95% confidence interval | p    |
|--------|---------------------------------------------------------------------------------------|-----|-------------------------|------|
| Week 7 | -0.01                                                                                 | 0.1 | -0.2, 0.2               | 0.9  |
| Week 9 | 0.2                                                                                   | 0.1 | 0.1, 0.4                | 0.01 |

**Figure S9** Ataxia coefficient of *Npc1*<sup>+/+</sup> ( $n_{\text{female}} = 10$ ;  $n_{\text{male}} = 5 - 6$ ) and *Npc1*<sup>+/-</sup> ( $n_{\text{female}} = 14$ ;  $n_{\text{male}} = 14 - 15$ ) mice, measured using DigiGait at 5, 7, and 9 weeks of age. The box and whiskers plot depicts the median, IQR, and the maximum and minimum values within 1.5 times the IQR. Statistical analysis: Random effects generalized least squares regression with animals as a random effect, adjusted for age and gender or genotype and gender.
